# Supplementary material
Source: PubMed Central journal article supplement (PMC2755672)
Supplement: supp_M109.013698_jbc.M109.013698-1.pdf [file supp_M109.013698_jbc.M109.013698-1.pdf]

## SUPPLEMENTAL FIGURES

### FIGURE LEGENDS

Supplemental Fig. 1. Effects of siRNAs. siRNAs for PP1, PP2Ac, PP5, PR55 $\alpha$ , PR61 $\alpha$ , PR61 $\delta$  and PR61 $\epsilon$  were transfected into HEK293T cells. The effects of these siRNAs on endogenous proteins (PP2Ac and PR55 $\alpha$ ) or overexpressed proteins were analyzed by Western blot.

Supplemental Fig. 2. Activities of PP1, PP2A and PP5. Equal amount of Phosphorylated  $\beta$ -catenin was incubated with purified PP1, PP2A and PP5 for 2h. Phosphatase buffer alone was used as a control.  $\beta$ -catenin was analyzed by Western blot using Abs that recognize total  $\beta$ -catenin or phosphorylated  $\beta$ -catenin.

Supplemental Fig. 3. Screening of PR55 $\alpha$  shRNAs. HEK293T cells were cotransfected with a Myc-tagged PR55 $\alpha$  plasmid and each of these shRNA constructs. PR55 $\alpha$  protein was analyzed by Western blot using an anti-Myc Ab. The results from duplicated experiments suggest that TRCN0000002492 and TRCN0000002493 can efficiently knock down PR55 $\alpha$ . TRCN0000002493 was used for generating lentivirus and stable cell lines.

Supplemental Fig. 4. Coomassie staining of GST fusion proteins. GST, GST- $\beta$ -catenin, GST-Axin(Cat+S45K) and GST-Axin(G3+Cat) were purified from E.coli BL21 (DE3) using Glutathione beads. These proteins were used in GST pull-down assays for protein-protein interactions.

Supplemental Fig. 5. Axin (Cat+S45K) but not Axin (Cat) alone does binds PR55 $\alpha$ . Flag-tagged PR55 $\alpha$  was cotransfected into HEK293T cells with Myc-tagged Axin (Cat+S45K) or Axin (Cat). These Axin constructs have been described previously (4). Axin fragments were immunoprecipitated with 9E10 beads and PR55 $\alpha$  was analyzed by western blot with polyclonal anti-Flag Ab.

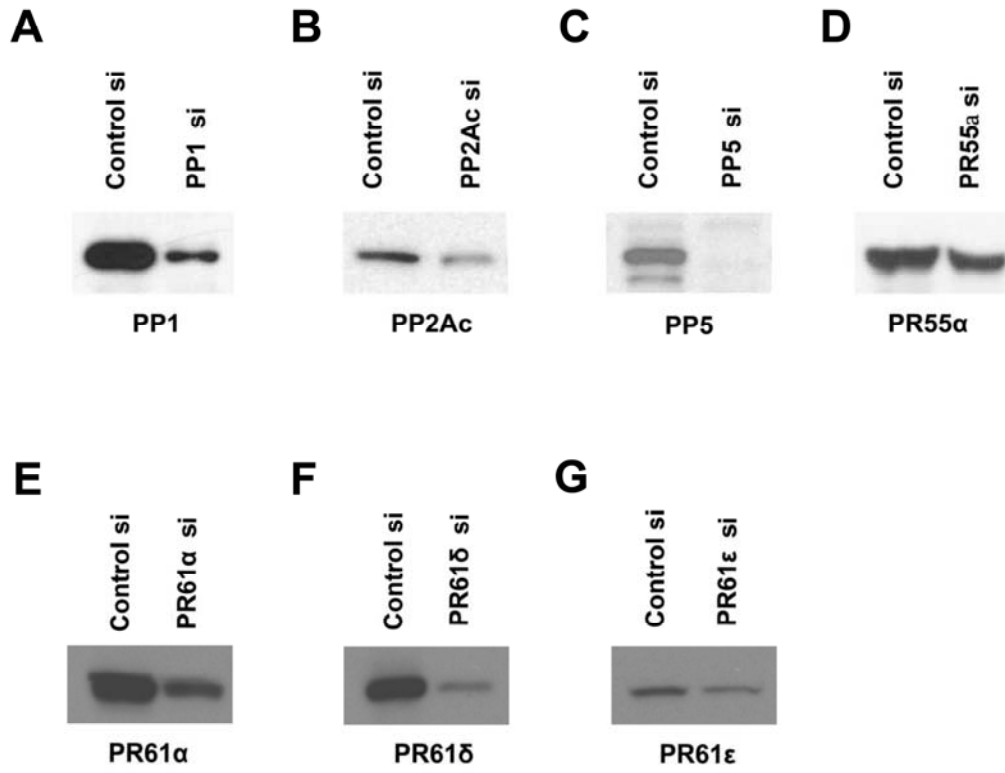

Supplemental Figure 1

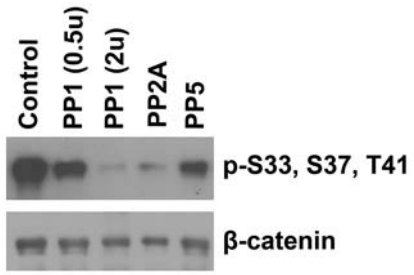

**Supplemental Figure 2**

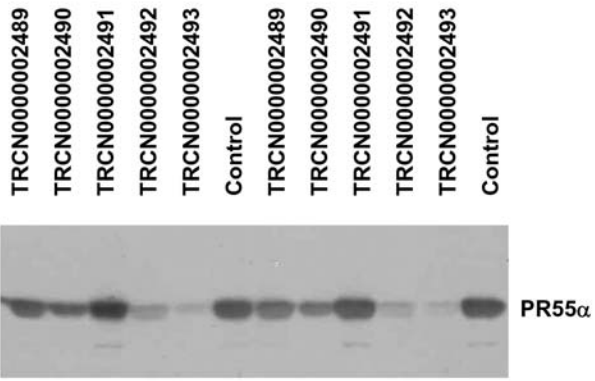

Supplemental Figure 3

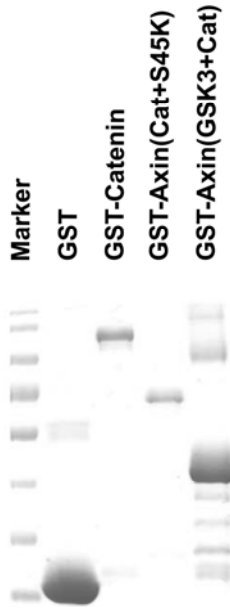

**Supplemental Figure 4**

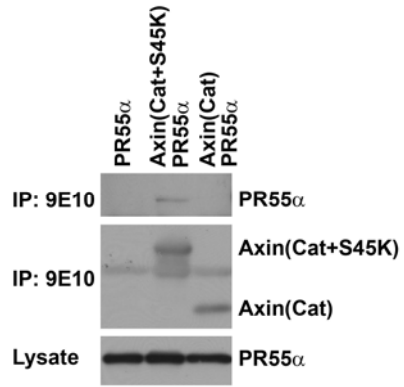

Supplemental Figure 5
